# Supplementary material for: Microbial Analysis of Saliva to Identify Oral Diseases Using a Point-of-Care Compatible qPCR Assay
Source: PubMed Central journal article supplement (PMC7565348; doi:10.3390/jcm9092945), 2020-09-11
Supplement: jcm-09-02945-s001.pdf [file jcm-09-02945-s001.pdf]

## Primer Efficiency

A quantifiable range between 10 ng–0.1 pg total DNA per reaction was aimed for point-of-care (POC) platforms. Therefore, duplex qPCR reactions were set up always including a 10-fold dilution series for one caries or periodontitis target (FAM) and 0.01 ng *Serinicoccus marinus* (LC610) to meet POC requirements. qPCR for reference material was repeated three times, each time preparing all reagents and standards from scratch. For a better understanding, oral specialist demanded the display of genome equivalents per ml instead of template per reaction. Each x axis displays the log10 of cells that was calculated on the basis of complete NCBI assembly genomes.

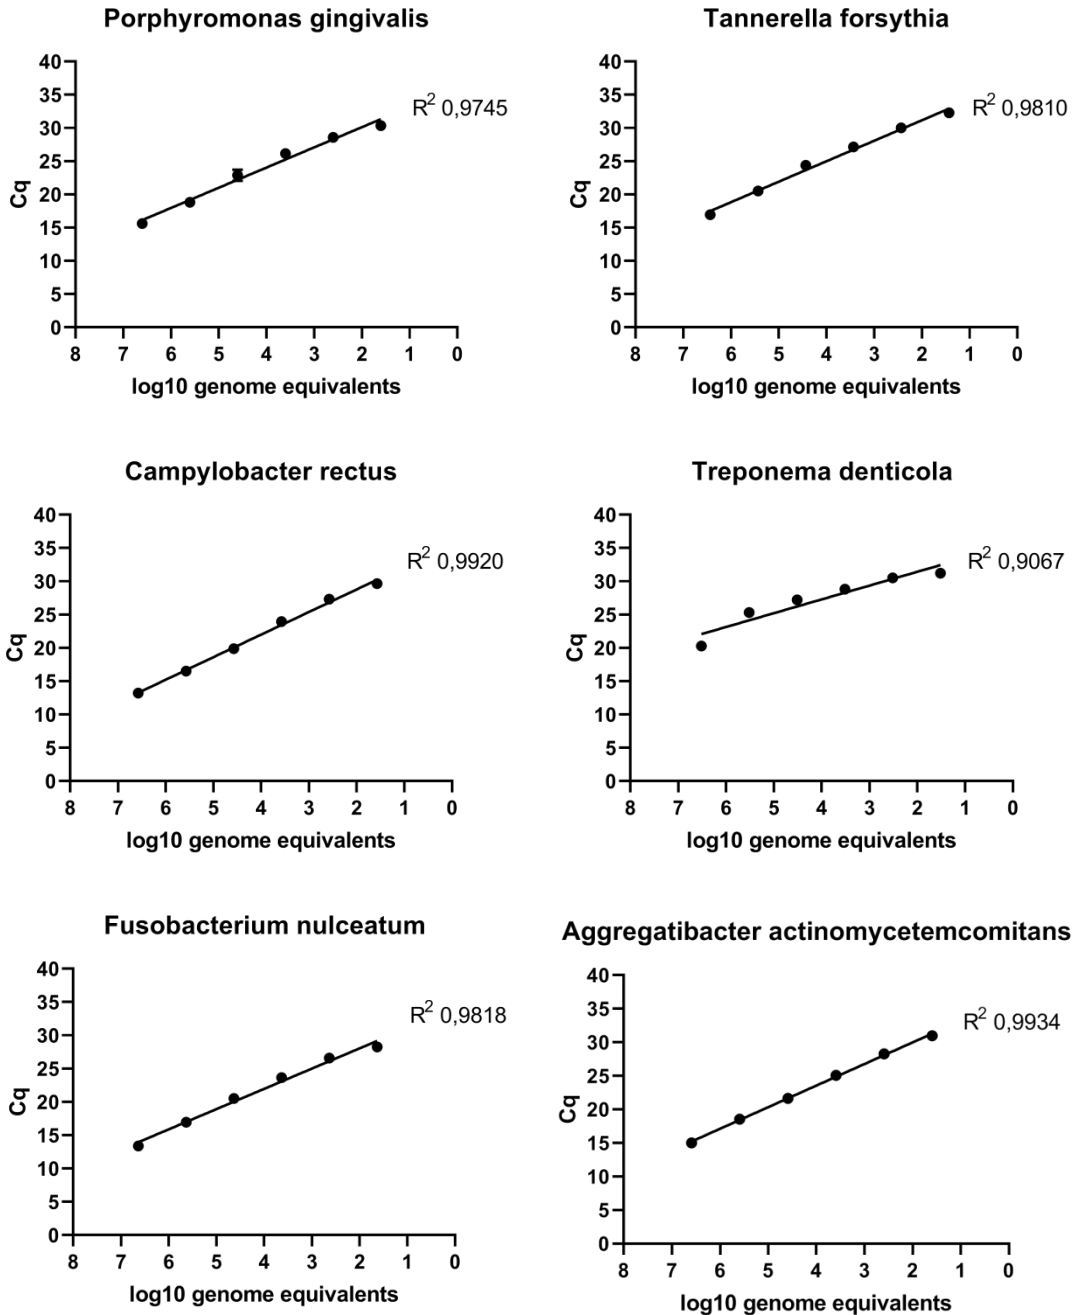

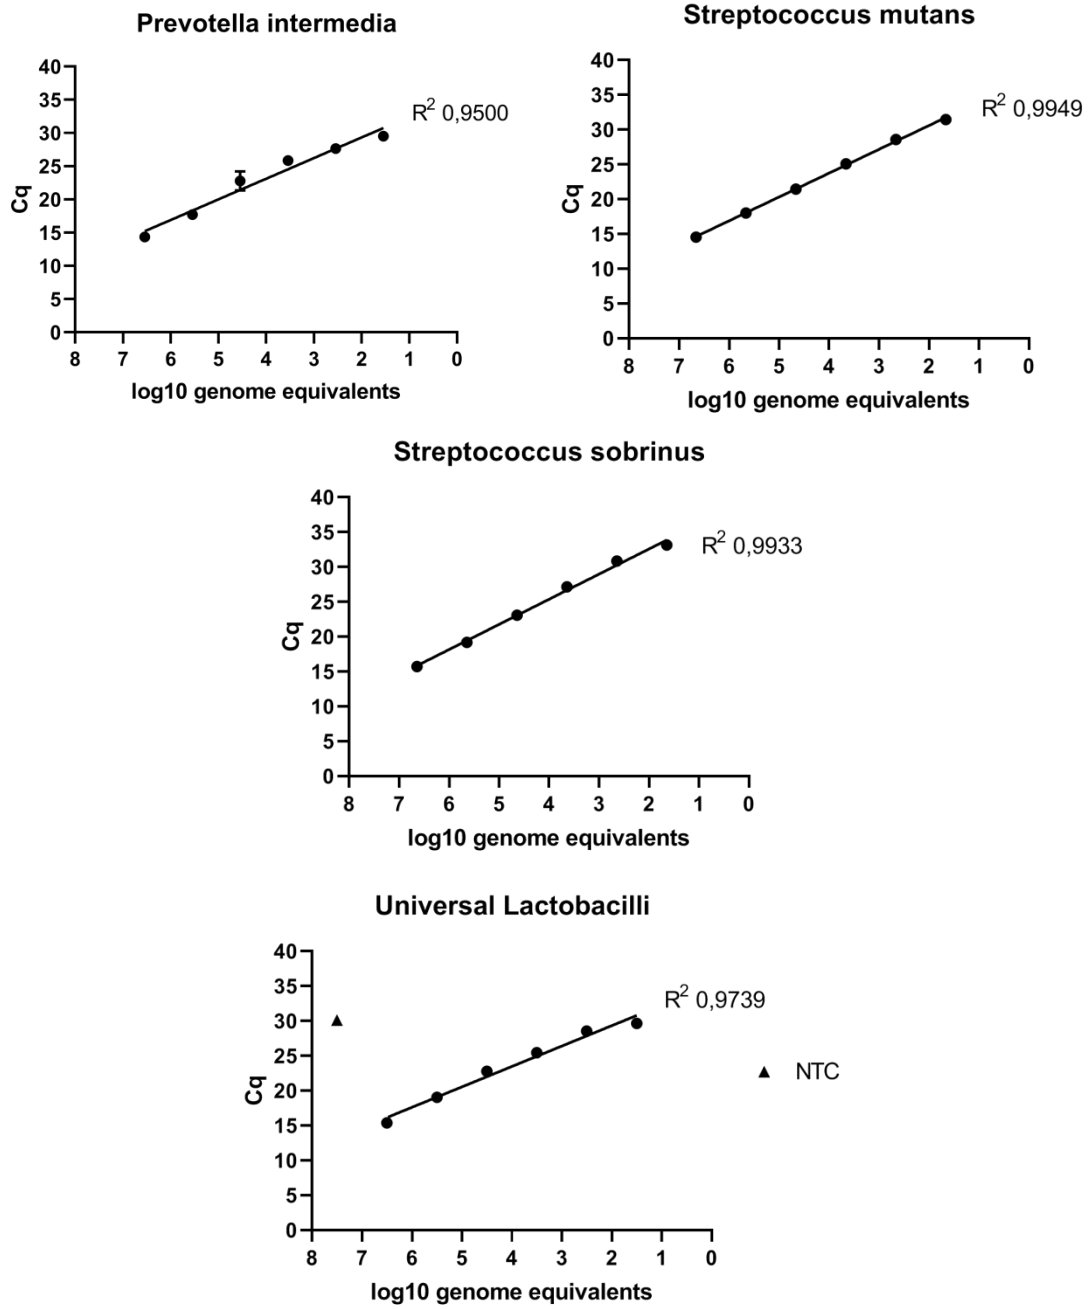

**Figure S1.** Duplex qPCR results of three consecutive PCR runs for all oral targets.

**Table 1.** Data (triplets) of standard curves for all bacterial taxa

|                      |          | log 10 (CFU/mL) | run 1  |        |        | run 2 |        |        | run 3  |        |        |
|----------------------|----------|-----------------|--------|--------|--------|-------|--------|--------|--------|--------|--------|
| <i>P. gingivalis</i> | NC       |                 |        |        |        |       |        |        |        |        |        |
|                      | 10ng     | 6.6             | 16.44  | 15.78  | 15.41  | 16.48 | 15.68  | 15.78  | 15.01  | 14.88  | 14.94  |
|                      | 1ng      | 5.6             | 19.06  | 19.12  | 19.09  | 19.2  | 18.79  | 19.21  | 18.39  | 18.42  | 18.09  |
|                      | 0.1ng    | 4.6             | 23.46  | 23.8   | 23.05  | 23.73 | 23.29  | 23.11  | 21.61  | 21.97  | 21.82  |
|                      | 0.01ng   | 3.6             | 25.97  | 26.78  | 26.48  | 26.76 | 26.31  | 26.62  | 25.51  | 25.44  | 25.33  |
|                      | 1pg      | 2.6             | 28.69  | 28.17  | 28.34  | 29.17 | 28.91  | 28.46  | 28.78  | 28.5   | 28.29  |
|                      | 0.1pg    | 1.6             | 29.95  | 30.03  | 30.1   | 30.19 | 30.75  | 30.46  | 30.55  | 30.68  | 30.55  |
|                      | 0.01pg** | 0.6*            | 31.54* | 27.65* | 31.34* | 32.4* | 31.65* | 32.03* | 32.42* | 32.62* | 32.06* |
| <i>T. forsythia</i>  | NC       |                 |        |        |        |       |        |        |        |        |        |
|                      | 10ng     | 6.43            | 17.44  | 17.77  | 17.83  | 17.23 | 17.05  | 16.97  | 15.97  | 15.98  | 16.24  |
|                      | 1ng      | 5.43            | 20.92  | 21.1   | 21.34  | 20.94 | 20.68  | 20.68  | 19.57  | 19.67  | 19.62  |
|                      | 0.1ng    | 4.43            | 24.98  | 24.93  | 25.13  | 24.94 | 24.63  | 24.59  | 23.38  | 23.34  | 23.41  |
|                      | 0.01ng   | 3.43            |        | 27.4   | 27.13  | 27.13 | 27.9   | 27.49  | 26.7   | 26.87  | 26.66  |
|                      | 1pg      | 2.43            |        | 30.29  | 29.77  | 30.29 | 30.55  | 29.88  | 29.67  | 29.78  | 29.94  |
|                      | 0.1pg    | 1.43            | 31.64  | 32.24  | 31.9   | 32.07 | 32.37  | 32.74  | 32.33  | 32.9   | 32.24  |
|                      | 0.01pg** | 0.43*           | 33.09* | 27.31* |        |       |        |        |        |        |        |
| <i>T. denticola</i>  | NC       |                 |        |        |        |       |        |        |        |        |        |
|                      | 10ng     | 6.51            | 20.25  | 20.7   | 20.4   | 19.9  | 20.1   | 20.32  | 20.4   | 20.63  | 19.93  |
|                      | 1ng      | 5.51            | 25.61  | 25.14  | 25.63  | 25.83 | 24.96  | 25.26  | 25.12  | 25.18  | 25.13  |
|                      | 0.1ng    | 4.51            | 27.04  | 27.17  | 27.16  | 27.13 | 27.14  | 27.27  | 27.29  | 27.31  | 27.43  |
|                      | 0.01ng   | 3.51            | 28.8   | 28.81  | 28.69  | 28.63 | 28.89  | 28.78  | 28.98  | 29.01  | 28.79  |

|                      |          |        |        |        |        |        |        |        |        |       |       |
|----------------------|----------|--------|--------|--------|--------|--------|--------|--------|--------|-------|-------|
|                      | 1pg      | 2.51   | 30.43  | 30.52  | 30.43  | 30.54  | 30.61  | 30.51  | 30.49  | 30.75 | 30.52 |
|                      | 0.1pg    | 1.51   |        | 31.02  | 31.37  | 31.38  | 31.61  | 30.69  | 31.38  | 31.43 | 30.87 |
|                      | 0.01pg** | 0.51*  |        |        |        |        |        |        |        |       |       |
| <i>F. nucleatum</i>  | NC       |        |        |        |        |        |        |        |        |       |       |
|                      | 10ng     | 6.63   | 13.79  | 13.61  | 13.83  | 12.97  | 13.17  | 13.57  | 13.57  | 12.84 | 13.06 |
|                      | 1ng      | 5.63   | 17.36  | 17.57  | 17.51  | 17.33  | 17.13  | 17.02  | 16.46  | 16.53 | 15.62 |
|                      | 0.1ng    | 4.63   | 20.96  | 21.62  | 20.83  | 20.67  | 21.02  | 20.32  | 19.77  | 19.89 | 19.58 |
|                      | 0.01ng   | 3.63   | 23.65  | 24.06  | 23.81  | 23.71  | 24.04  | 23.65  | 23.08  | 23.44 | 23.28 |
|                      | 1pg      | 2.63   | 26.29  | 26.57  | 26.46  | 26.59  | 26.85  | 26.82  | 26.34  | 26.74 | 26.55 |
|                      | 0.1pg    | 1.63   | 27.99  | 28.17  | 27.95  | 27.79  | 28.65  | 28.31  | 28.57  | 28.64 | 28.27 |
| 0.01pg**             | 0.63*    | 29.08* | 28.81* | 29.22* | 29.47* | 29.79* | 29.84* | 29.97* | 29.92* | 0*    |       |
| <i>C. rectus</i>     | NTC      |        |        |        |        |        |        |        |        |       |       |
|                      | 10ng     | 6.57   | 13.87  | 13.76  | 12.52  | 13.14  | 13.12  | 12.34  | 13.15  | 13.34 | 13.66 |
|                      | 1ng      | 5.57   | 16.65  | 16.37  | 15.92  | 16.37  | 16.35  | 16     | 16.9   | 17.24 | 16.82 |
|                      | 0.1ng    | 4.57   | 19.31  | 19.94  | 20.26  | 19.42  | 19.46  | 19.67  | 20.5   | 19.7  | 20.57 |
|                      | 0.01ng   | 3.57   | 23.83  | 23.93  | 23.83  | 23.89  | 23.9   | 23.94  | 23.88  | 24.18 | 24.04 |
|                      | 1pg      | 2.57   | 27.55  | 27.71  | 27.34  | 27.09  | 27.43  | 27.33  | 27.08  | 27.13 | 27.18 |
|                      | 0.1pg    | 1.57   | 29.89  | 29.84  | 29.91  | 29.17  | 29.44  | 29.16  | 29.85  | 29.84 | 29.67 |
| 0.01pg**             | 0.57*    | 31.73* | 32.69* | 31.56* | 31.09* | 30.76* |        | 32.17* | 31.65* |       |       |
| <i>P. intermedia</i> | NC       |        |        |        |        |        |        |        |        |       |       |
|                      | 10ng     | 6.54   | 14.53  | 14.84  | 14.94  | 13.81  | 13.94  | 14.18  | 13.74  | 14.12 | 15.04 |
|                      | 1ng      | 5.54   | 18.31  | 18.29  | 18.27  | 17.08  | 16.97  | 17.53  | 17.34  | 17.94 | 17.72 |
|                      | 0.1ng    | 4.54   | 23.44  | 24.51  | 25.08  | 21.19  | 21.5   | 21.2   | 21.94  | 22.71 | 23.59 |
|                      | 0.01ng   | 3.54   | 26.42  | 26.53  | 26.55  | 25.61  | 25.19  | 25.46  | 25.52  | 25.62 | 25.66 |
|                      | 1pg      | 2.54   | 27.76  | 28.18  | 27.9   | 27.51  | 27.54  | 27.12  | 27.67  | 27.52 | 27.55 |

|                                 |          |       |       |        |        |        |        |        |        |       |        |
|---------------------------------|----------|-------|-------|--------|--------|--------|--------|--------|--------|-------|--------|
|                                 | 0.1pg    | 1.54  | 29.85 | 29.96  | 29.7   | 29.55  | 29.27  | 29.18  | 29.48  | 29.21 | 29.55  |
|                                 | 0.01pg** | 0.54* | 31.3* | 30.87* | 31.14* |        |        |        | 30.49* |       | 30.23* |
| <i>A. actinomycetemcomitans</i> | NC       |       |       |        |        |        |        |        |        |       |        |
|                                 | 10ng     | 6.59  | 14.58 | 15.06  | 15.14  | 14.68  | 15.63  | 15.2   | 14.46  | 15.34 | 14.98  |
|                                 | 1ng      | 5.59  | 18.22 | 18.6   | 18.63  | 17.71  | 19.21  | 19.33  | 17.95  | 18.77 | 18.38  |
|                                 | 0.1ng    | 4.59  | 21.57 | 21.98  | 22     | 21.44  | 22.02  | 22.2   | 21.34  | 21.14 | 21.21  |
|                                 | 0.01ng   | 3.59  | 25.52 | 25.14  | 25.13  | 24.81  | 24.93  | 25.18  | 24.9   | 25.06 | 25.22  |
|                                 | 1pg      | 2.59  | 29.56 | 28.04  | 27.77  | 28.16  | 27.78  | 28.02  | 28.5   | 28.37 | 28.38  |
|                                 | 0.1pg    | 1.59  | 30.81 | 30.55  | 30.77  | 30.85  | 30.68  | 30.99  | 31.05  | 31.56 | 31.6   |
|                                 | 0.01pg** | 0.59* |       | 33.18* | 34.34* | 34.49* |        |        |        |       |        |
| <i>S. mutans</i>                | NC       |       |       |        |        |        |        |        |        |       |        |
|                                 | 10ng     | 6.66  | 14.81 | 14.71  | 14.46  | 14.44  | 14     | 14.28  | 14.58  | 14.77 | 14.77  |
|                                 | 1ng      | 5.66  | 18.24 | 18.35  | 18.12  | 17.91  | 18.15  | 17.12  | 18.08  | 18.47 | 17.83  |
|                                 | 0.1ng    | 4.66  | 21.65 | 21.66  | 21.15  | 21.19  | 21.66  | 20.61  | 22.08  | 21.75 | 21.37  |
|                                 | 0.01ng   | 3.66  | 25.17 | 25.28  | 24.76  | 24.9   | 24.89  | 24.72  | 25.31  | 25.39 | 25.42  |
|                                 | 1pg      | 2.66  | 28.23 | 28.91  | 28.17  | 28.04  | 28.47  | 27.98  | 29.19  | 29.46 | 28.82  |
|                                 | 0.1pg    | 1.66  | 30.83 | 31.51  | 30.89  | 31.13  | 31.7   | 31.74  | 31.82  | 32    | 31.4   |
|                                 | 0.01pg** | 0.66* |       |        |        |        | 33.67* | 33.42* |        |       |        |
| <i>S. sobrinus</i>              | NC       |       |       |        |        |        |        |        |        |       |        |
|                                 | 10ng     | 6.64  | 15.89 | 15.71  | 15.69  | 15.99  | 15.56  | 15.58  | 15.81  | 15.6  | 15.68  |
|                                 | 1ng      | 5.64  | 19.01 | 19.54  | 18.94  | 19.5   | 19.02  | 19.08  | 19.24  | 19.32 | 19.04  |
|                                 | 0.1ng    | 4.64  | 23.01 | 23.08  | 22.93  | 22.96  | 22.96  | 23.18  | 23.24  | 23.15 | 23.25  |
|                                 | 0.01ng   | 3.64  | 27.17 | 27.37  | 27.16  | 27.09  | 26.97  | 26.92  | 27.22  | 27.5  | 27.06  |
|                                 | 1pg      | 2.64  | 31.04 | 31.03  | 31.01  | 30.59  | 30.46  | 30.4   | 31.18  | 30.93 | 31.05  |
|                                 | 0.1pg    | 1.64  | 33.39 | 33.24  | 33.02  | 32.85  | 32.62  | 32.61  | 33.34  | 33.46 | 33.75  |

|                                      |                 |              |               |               |               |       |       |       |               |               |           |
|--------------------------------------|-----------------|--------------|---------------|---------------|---------------|-------|-------|-------|---------------|---------------|-----------|
|                                      | <i>0.01pg**</i> | <i>0.64*</i> |               |               |               |       |       |       |               |               |           |
| <b>Universal <i>Lactobacilli</i></b> | NC              |              | 30.47         | 30.45         | 30.12         | 29.9  | 29.97 | 29.94 | 30.03         | 30.08         | 30.02     |
|                                      | 10ng            | 6.5          | 15.5          | 15.57         | 15.09         | 15.77 | 15.44 | 14.78 | 15.5          | 15.69         | 15.01     |
|                                      | 1ng             | 5.5          | 19.23         | 18.64         | 18.52         | 19.18 | 19.25 | 18.43 | 19.42         | 19.94         | 18.87     |
|                                      | 0.1ng           | 4.5          | 23.03         | 22.89         | 21.95         | 22.2  | 23.45 | 22.35 | 23.01         | 23.45         | 22.65     |
|                                      | 0.01ng          | 3.5          | 25.36         | 25.54         | 25.47         | 25.47 | 25.45 | 25.23 | 25.53         | 25.64         | 25.36     |
|                                      | 1pg             | 2.5          | 28.68         | 29.05         | 28.76         | 28.63 | 28.7  | 28.54 | 27.99         | 28.56         | 27.99     |
|                                      | 0.1pg           | 1.5          | 29.87         | 30.03         | 29.96         | 29.75 | 29.48 | 29.45 | 29.47         | 29.55         | 29.15     |
|                                      | <i>0.01pg**</i> | <i>0.5*</i>  | <i>29.86*</i> | <i>29.79*</i> | <i>29.82*</i> |       |       |       | <i>29.29*</i> | <i>29.58*</i> | <i>0*</i> |

NC = negative control.
